# Supplementary material
Source: Springer Nature journal article supplement (https://www.springermedizin.de/resource/supplementary/12936_2006_333_MOESM1_ESM.pdf/9547568)

TOTAL, 9 DISTRICTS  
N=373 (2149)

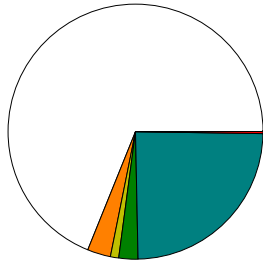

MANNAR  
N=4 (13)

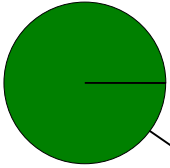

TRINCOMALEE  
N=56 (371)

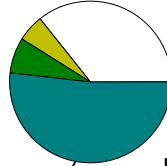

POLLONARUWA  
N=51 (77)

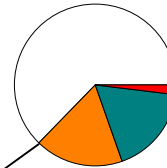

VAVUNIYA  
N=7 (82)

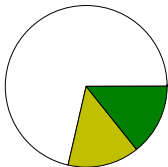

BATTICALOA  
N=14 (154)

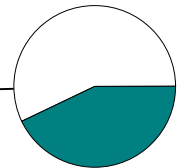

ANURADHAPURA  
N=183 (795)

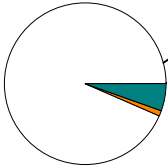

AMPARA  
N=7 (53)

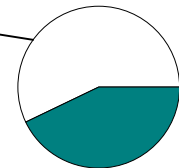

KURUNEGALA  
N=48 (565)

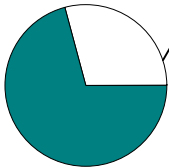

MONARAGALA  
N=3 (39)

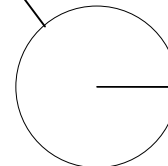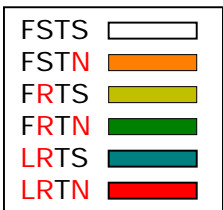

Supplement: MOESM1 [file 9547568]
